# Supplementary material
Source: PubMed Central journal article supplement (PMC5455796)
Supplement: NIHMS830395-supplement.pdf [file NIHMS830395-supplement.pdf]

# Thalamocortical Dysconnectivity in Autism Spectrum Disorder: An Analysis of the Autism Brain Imaging Data Exchange

## *Supplemental Information*

### Supplemental Methods

#### *Cortical Regions-of-Interest for Seed-based Functional Connectivity Analysis*

To examine within thalamus connectivity, we employed the same approach used in our earlier investigations (1;2), which was adapted from the method originally used by Zhang et al. (3). Specifically, the cortex was divided into six non-overlapping regions-of-interest (ROIs) corresponding to the prefrontal cortex, motor cortex/supplementary motor area, somatosensory cortex, temporal lobe, posterior parietal cortex, and occipital lobe. The cortical ROIs were then used as seeds in a seed-to-voxel functional connectivity analysis. Rather than creating the ROIs by tracing a single subject's brain, as was in the original investigations by Zhang et al., (3), the cortical ROIs were constructed using two probabilistic atlases: the Laboratory of Neuroimaging (LONI) Probabilistic Atlas of cortical structures (4) and the Harvard-Oxford supplementary motor area probabilistic atlas (<http://www.fmrib.ox.ac.uk/fsl/>). The prefrontal cortex ROI included the superior, middle, and inferior frontal gyri; middle and lateral orbitofrontal gyri; gyrus rectus, and anterior cingulate gyrus from the LONI atlas. The motor cortex/supplementary motor area ROI included the precentral gyrus from the LONI atlas and the Harvard-Oxford supplementary motor area atlas. The somatosensory region-of-interest consisted of the post-central gyrus from the LONI atlas. The temporal lobe region-of-interest included the superior, middle, and inferior temporal gyri, parahippocampal gyrus, and fusiform gyrus from the LONI atlas. The posterior parietal region-of-interest included the superior parietal, supramarginal, and angular gyri, posterior cingulate, and precuneus from the LONI atlas. The occipital region-of-interest included the superior, middle, and inferior occipital gyri, lingual gyrus, and cuneus from the LONI atlas. The cortical regions-of-interest were masked with the LONI probabilistic atlas grey matter tissue map, thresholded at .15, to eliminate voxels with low grey matter intensity. Cortical ROIs are displayed in Supplemental Figure S1.

Supplemental Table S1. Demographic data by ABIDE site

| Site         | n          |            | Sex        |           |            |           | Age         |            |             |            |             | Full Scale IQ |              |             |            |              |             |                 |   |
|--------------|------------|------------|------------|-----------|------------|-----------|-------------|------------|-------------|------------|-------------|---------------|--------------|-------------|------------|--------------|-------------|-----------------|---|
|              | TD ASD     |            | TD         |           | ASD        |           | TD          |            | ASD         |            |             | p             | TD           |             |            | ASD          |             |                 |   |
|              |            |            | M          | F         | M          | F         | Mean        | SD         | Mean        | SD         |             |               | n            | Mean        | SD         | n            | Mean        | SD              | p |
| Caltech      | 8          | 8          | 6          | 2         | 6          | 2         | 21.3        | 2.4        | 21.4        | 1.3        | .908        | 8             | 118.0        | 9.4         | 7          | 103.3        | 10.5        | .013            |   |
| KKI          | 8          | 8          | 5          | 3         | 5          | 3         | 10.4        | 1.7        | 9.3         | 1.2        | .166        | 8             | 113.3        | 11.5        | 8          | 97.4         | 18.3        | .057            |   |
| Leuven       | 21         | 21         | 19         | 2         | 19         | 2         | 19.5        | 4.7        | 18.3        | 5.1        | .453        | 21            | 113.3        | 13.0        | 21         | 102.3        | 13.0        | .009            |   |
| Max Munich   | 9          | 9          | 7          | 2         | 7          | 2         | 27.4        | 3.5        | 27.4        | 6.2        | .999        | 9             | 112.3        | 8.9         | 8          | 111.0        | 11.1        | .787            |   |
| NYU          | 62         | 62         | 53         | 9         | 53         | 9         | 13.9        | 5.6        | 14.7        | 5.7        | .449        | 62            | 112.5        | 13.7        | 62         | 107.7        | 16.7        | .036            |   |
| Olin         | 8          | 8          | 7          | 1         | 7          | 1         | 18.4        | 3.3        | 17.9        | 4.0        | .788        | 8             | 122.9        | 11.5        | 6          | 106.0        | 24.4        | .109            |   |
| Pitt         | 14         | 14         | 12         | 2         | 12         | 2         | 18.0        | 5.3        | 18.1        | 5.4        | .990        | 14            | 110.0        | 10.7        | 14         | 112.7        | 12.5        | .542            |   |
| Trinity      | 19         | 19         | 19         | 0         | 19         | 0         | 17.9        | 3.8        | 16.9        | 2.7        | .382        | 19            | 110.6        | 12.4        | 19         | 109.3        | 16.7        | .776            |   |
| UCLA         | 34         | 34         | 31         | 3         | 31         | 3         | 13.3        | 1.8        | 13.3        | 2.6        | .873        | 34            | 105.4        | 11.1        | 34         | 100.6        | 14.6        | .132            |   |
| USM          | 28         | 28         | 28         | 0         | 28         | 0         | 21.4        | 6.5        | 21.9        | 6.7        | .801        | 28            | 114.2        | 13.8        | 28         | 98.9         | 16.4        | <.001           |   |
| Yale         | 17         | 17         | 12         | 5         | 12         | 5         | 13.4        | 2.7        | 13.3        | 3.0        | .956        | 17            | 102.6        | 16.7        | 17         | 89.9         | 22.3        | .072            |   |
| <b>Total</b> | <b>228</b> | <b>228</b> | <b>199</b> | <b>29</b> | <b>199</b> | <b>29</b> | <b>16.6</b> | <b>6.0</b> | <b>16.6</b> | <b>6.1</b> | <b>.948</b> | <b>228</b>    | <b>111.3</b> | <b>13.3</b> | <b>224</b> | <b>103.4</b> | <b>17.0</b> | <b>&lt;.001</b> |   |

Supplemental Table S2. Thalamocortical functional connectivity abnormalities in ASD: cortex seed-based analysis

| Cortical Seed             | Contrast | Brain Region                      | MNI Coordinates |     |    | Peak<br>T-value | Cluster-<br>Level<br>$P_{FWE-corr}$ | Cluster<br>Size<br>(Voxels)* |
|---------------------------|----------|-----------------------------------|-----------------|-----|----|-----------------|-------------------------------------|------------------------------|
|                           |          |                                   | X               | Y   | Z  |                 |                                     |                              |
| <b>Prefrontal</b>         | TD>ASD   | <i>No Significant Differences</i> | --              | --  | -- | --              | --                                  | --                           |
|                           | ASD>TD   | R. Pulvinar                       | 6               | -26 | 10 | 4.64            | .021                                | 13                           |
| <b>Motor</b>              | TD>ASD   | <i>No Significant Differences</i> | --              | --  | -- | --              | --                                  | --                           |
|                           | ASD>TD   | L. VA/VLp Nucleus                 | -14             | -6  | 10 | 4.82            | .012                                | 17                           |
|                           |          | R. VA/VLp Nucleus                 | 14              | -6  | 12 | 4.80            | .001                                | 36                           |
|                           |          | L. VPL Nucleus                    | -14             | -18 | 8  | 3.98            | .004                                | 24                           |
| <b>Somatosensory</b>      | TD>ASD   | <i>No Significant Differences</i> | --              | --  | -- | --              | --                                  | --                           |
|                           | ASD>TD   | R. VPL Nucleus                    | 12              | -16 | 2  | 4.52            | <.001                               | 34                           |
|                           |          | L. VLp Nucleus                    | -10             | -16 | -4 | 4.07            | .047                                | 8                            |
|                           |          | L. VPL Nucleus                    | -14             | -16 | 8  | 3.45            | .037                                | 9                            |
| <b>Temporal</b>           | TD>ASD   | <i>No Significant Differences</i> | --              | --  | -- | --              | --                                  | --                           |
|                           | ASD>TD   | R. Pulvinar                       | 6               | -24 | 8  | 4.48            | .007                                | 21                           |
| <b>Posterior Parietal</b> | TD>ASD   | <i>No Significant Differences</i> | --              | --  | -- | --              | --                                  | --                           |
|                           | ASD>TD   | <i>No Significant Differences</i> | --              | --  | -- | --              | --                                  | --                           |
| <b>Occipital</b>          | TD>ASD   | <i>No Significant Differences</i> | --              | --  | -- | --              | --                                  | --                           |
|                           | ASD>TD   | <i>No Significant Differences</i> | --              | --  | -- | --              | --                                  | --                           |

\* Voxel size = 2 x 2 x 2 mm

Abbreviations: ASD=Autism Spectrum Disorder; FWE-corr=Family-wise Error Corrected; L=Left; MNI=Montreal Neurological Institute; R=Right; TD=Typically Developing; VA=Ventral Anterior; VLp=Ventral Lateral Posterior; VPL=Ventral Posterior Lateral

Supplemental Table S3. Thalamocortical functional connectivity abnormalities in ASD: thalamus seed-based analysis

| Thalamic Seed      | Contrast | Cluster Size (Voxels)* | Cluster-Level $P_{FWE-corr}$ | MNI Coordinates                   |     |      | Peak T-value                     | Brain Region                         |
|--------------------|----------|------------------------|------------------------------|-----------------------------------|-----|------|----------------------------------|--------------------------------------|
|                    |          |                        |                              | X                                 | Y   | Z    |                                  |                                      |
| Prefrontal         | TD>ASD   |                        |                              | <i>No Significant Differences</i> |     |      |                                  |                                      |
|                    | ASD>TD   | 1368                   | <.001                        | -52                               | -38 | 2    | 4.90                             | L. Middle Temporal Gyrus (BA 22)     |
|                    |          |                        |                              | -54                               | -18 | -4   | 4.52                             | L. Superior Temporal Gyrus (BA 22)   |
|                    |          |                        |                              | -52                               | -28 | 6    | 4.50                             | L. Superior Temporal Gyrus (BA 41)   |
|                    |          | 256                    | .015                         | 48                                | -32 | -2   | 4.26                             | R. Superior Temporal Gyrus (BA 41)   |
|                    |          |                        |                              | 48                                | -34 | 6    | 4.08                             | R. Superior Temporal Gyrus (BA 41)   |
|                    |          |                        |                              | 50                                | -38 | 20   | 3.91                             | R. Superior Temporal Gyrus (BA 22)   |
|                    |          | 382                    | .002                         | 60                                | -2  | 0    | 3.99                             | R. Superior Temporal Gyrus (BA 22)   |
|                    |          |                        |                              | 56                                | 16  | -8   | 3.79                             | R. Superior Temporal Gyrus (BA 38)   |
|                    |          |                        |                              | 48                                | -16 | 8    | 3.78                             | R. Superior Temporal Gyrus (BA 42)   |
| Motor              | TD>ASD   | 387                    | .002                         | -4                                | -22 | 10   | 4.37                             | L. Thalamus                          |
|                    |          |                        |                              | 10                                | -14 | 12   | 4.21                             | R. Thalamus                          |
|                    |          |                        |                              | -10                               | -14 | 10   | 3.92                             | L. Thalamus                          |
|                    | ASD>TD   | 1060                   | <.001                        | -54                               | -48 | 18   | 4.87                             | L. Superior Temporal Gyrus (BA 22)   |
|                    |          |                        |                              | -56                               | -68 | 12   | 4.74                             | L. Middle Temporal Gyrus (BA 39)     |
|                    |          |                        |                              | -50                               | -26 | 24   | 4.41                             | L. Inferior Parietal Lobule (BA 40)  |
|                    |          | 712                    | <.001                        | 48                                | -32 | 8    | 4.69                             | R. Superior Temporal Gyrus (BA 41)   |
|                    |          |                        |                              | 50                                | -36 | 20   | 4.57                             | R. Superior Temporal Gyrus (BA 22)   |
|                    |          |                        |                              | 64                                | -34 | 8    | 4.53                             | R. Superior Temporal Gyrus (BA 22)   |
|                    |          | 228                    | .023                         | 8                                 | 10  | 34   | 4.61                             | R. Cingulate Gyrus (BA 24)           |
|                    |          |                        |                              | 4                                 | -2  | 45   | 3.62                             | R. Cingulate Gyrus (BA 24)           |
|                    |          | 460                    | .001                         | 64                                | -14 | 8    | 4.46                             | R. Transverse Temporal Gyrus (BA 42) |
|                    |          |                        |                              | 46                                | 6   | 10   | 3.75                             | R. Inferior Frontal Gyrus (BA 44)    |
|                    |          |                        |                              | 60                                | -8  | -8   | 3.73                             | R. Superior Temporal Gyrus (BA 22)   |
|                    |          | 744                    | <.001                        | 24                                | -4  | 74   | 4.46                             | R. Superior Frontal Gyrus (BA 6)     |
|                    |          |                        |                              | 40                                | -6  | 56   | 4.07                             | R. Precentral Gyrus (BA 4)           |
|                    |          |                        |                              | 32                                | 10  | 72   | 4.05                             | R. Superior Frontal Gyrus (BA 6)     |
|                    |          | 401                    | .002                         | -46                               | -12 | 56   | 4.32                             | L. Postcentral Gyrus (BA 3)          |
|                    |          |                        | -48                          | -18                               | 50  | 4.08 | L. Postcentral Gyrus (BA 2)      |                                      |
|                    |          |                        | -60                          | -16                               | 48  | 3.55 | L. Postcentral Gyrus (BA 2)      |                                      |
|                    | 340      | .004                   | -16                          | -46                               | 62  | 4.05 | L. Precuneus (BA 7)              |                                      |
|                    |          |                        | -12                          | -50                               | 70  | 3.83 | L. Precuneus (BA 7)              |                                      |
|                    |          |                        | -32                          | -32                               | 72  | 3.74 | L. Postcentral Gyrus (BA 5)      |                                      |
| Somatosensory      | TD>ASD   |                        |                              | <i>No Significant Differences</i> |     |      |                                  |                                      |
|                    | ASD>TD   |                        |                              | <i>No Significant Differences</i> |     |      |                                  |                                      |
| Temporal           | TD>ASD   |                        |                              | <i>No Significant Differences</i> |     |      |                                  |                                      |
|                    | ASD>TD   | 460                    | .001                         | -60                               | -54 | 14   | 5.19                             | L. Middle Temporal Gyrus (BA 39)     |
|                    |          |                        |                              | -58                               | -46 | 20   | 4.63                             | L. Superior Temporal Gyrus (BA 22)   |
|                    |          |                        |                              | -66                               | -34 | 20   | 3.41                             | L. Superior Temporal Gyrus (BA 22)   |
|                    |          | 346                    | .005                         | 54                                | -56 | 14   | 4.56                             | R. Middle Temporal Gyrus (BA 39)     |
|                    |          |                        |                              | 64                                | -48 | 14   | 4.04                             | R. Superior Temporal Gyrus (BA 22)   |
|                    |          |                        | 56                           | -42                               | 8   | 3.49 | R. Middle Temporal Gyrus (BA 21) |                                      |
| Posterior Parietal | TD>ASD   | 416                    | .001                         | -8                                | -14 | 4    | 4.32                             | L. Thalamus                          |
|                    |          |                        |                              | -14                               | -22 | 6    | 4.09                             | L. Thalamus                          |
|                    |          |                        |                              | 8                                 | -16 | 8    | 4.07                             | R. Thalamus                          |
|                    | ASD>TD   | 183                    | .032                         | -60                               | -58 | 16   | 4.71                             | L. Middle Temporal Gyrus (BA 39)     |
|                    |          |                        |                              | -42                               | -56 | 12   | 4.49                             | L. Middle Temporal Gyrus (BA 39)     |
|                    |          |                        |                              | -36                               | -64 | 18   | 3.89                             | L. Middle Temporal Gyrus (BA 39)     |
| Occipital          | TD>ASD   |                        |                              | <i>No Significant Differences</i> |     |      |                                  |                                      |
|                    | ASD>TD   |                        |                              | <i>No Significant Differences</i> |     |      |                                  |                                      |

\* Voxel size = 2 x 2 x 2 mm

Abbreviations: ASD=Autism Spectrum Disorder; BA=Broadmann Area; FWE-corr=Family-wise Error Corrected; L=Left; MNI=Montreal Neurological Institute; R=Right; TD=Typically Developing

Supplemental Table S4. Thalamocortical functional connectivity abnormalities in ASD by age group: cortical seed-based analysis

| Cortical Seed                                 | Contrast | Brain Region                 | MNI Coordinates |     |    | Peak T-value | Cluster-Level $P_{FWE-corr}$ | Cluster Size (Voxels)* |
|-----------------------------------------------|----------|------------------------------|-----------------|-----|----|--------------|------------------------------|------------------------|
|                                               |          |                              | X               | Y   | Z  |              |                              |                        |
| Children/Young Adolescents (age 6-13.27 yrs.) |          |                              |                 |     |    |              |                              |                        |
| Prefrontal                                    | TD>ASD   | R. Anterior Nucleus          | 8               | -4  | 4  | 3.82         | .048                         | 6                      |
|                                               | ASD>TD   | No Significant Differences   | --              | --  | -- | --           | --                           | --                     |
| Motor                                         | TD>ASD   | No Significant Differences   | --              | --  | -- | --           | --                           | --                     |
|                                               | ASD>TD   | No Significant Differences   | --              | --  | -- | --           | --                           | --                     |
| Somatosensory                                 | TD>ASD   | No Significant Differences   | --              | --  | -- | --           | --                           | --                     |
|                                               | ASD>TD   | No Significant Differences   | --              | --  | -- | --           | --                           | --                     |
| Temporal                                      | TD>ASD   | No Significant Differences   | --              | --  | -- | --           | --                           | --                     |
|                                               | ASD>TD   | No Significant Differences   | --              | --  | -- | --           | --                           | --                     |
| Posterior Parietal                            | TD>ASD   | No Significant Differences   | --              | --  | -- | --           | --                           | --                     |
|                                               | ASD>TD   | No Significant Differences   | --              | --  | -- | --           | --                           | --                     |
| Occipital                                     | TD>ASD   | No Significant Differences   | --              | --  | -- | --           | --                           | --                     |
|                                               | ASD>TD   | No Significant Differences   | --              | --  | -- | --           | --                           | --                     |
| Older Adolescents (age 13.28-18.00 yrs.)      |          |                              |                 |     |    |              |                              |                        |
| Prefrontal                                    | TD>ASD   | No Significant Differences   | --              | --  | -- | --           | --                           | --                     |
|                                               | ASD>TD   | R. Pulvinar                  | 6               | -24 | 8  | 4.12         | .029                         | 10                     |
| Motor                                         | TD>ASD   | No Significant Differences   | --              | --  | -- | --           | --                           | --                     |
|                                               | ASD>TD   | R. Anterior Nucleus          | 14              | -8  | 12 | 4.62         | .003                         | 26                     |
|                                               |          | R. Medial Dorsal Nucleus     | 6               | -10 | 12 | 4.28         | .005                         | 22                     |
|                                               |          | L. Anterior Nucleus          | -16             | -6  | 14 | 4.23         | .034                         | 11                     |
|                                               |          | L. Lateral Posterior Nucleus | -14             | -18 | 14 | 3.63         | .028                         | 12                     |
| Somatosensory                                 | TD>ASD   | No Significant Differences   | --              | --  | -- | --           | --                           | --                     |
|                                               | ASD>TD   | R. Medial Dorsal Nucleus     | 8               | -14 | 6  | 4.96         | .033                         | 8                      |
|                                               |          | L. Ventral Lateral Nucleus   | -10             | -16 | -4 | 4.36         | .011                         | 13                     |
| Temporal                                      | TD>ASD   | No Significant Differences   | --              | --  | -- | --           | --                           | --                     |
|                                               | ASD>TD   | L. Pulvinar                  | -16             | -22 | 6  | 4.85         | .005                         | 21                     |
|                                               |          | R. Medial Dorsal Nucleus     | 6               | -12 | 6  | 4.38         | .010                         | 17                     |
|                                               |          | R. Anterior Nucleus          | 14              | -4  | 16 | 4.11         | .050                         | 9                      |
|                                               |          | R. Pulvinar                  | 6               | -24 | 8  | 3.72         | .033                         | 11                     |
| Posterior Parietal                            | TD>ASD   | No Significant Differences   | --              | --  | -- | --           | --                           | --                     |
|                                               | ASD>TD   | R. Pulvinar                  | 12              | -22 | 8  | 3.67         | .046                         | 8                      |
| Occipital                                     | TD>ASD   | No Significant Differences   | --              | --  | -- | --           | --                           | --                     |
|                                               | ASD>TD   | No Significant Differences   | --              | --  | -- | --           | --                           | --                     |
| Adults (age 18.01+ yrs.)                      |          |                              |                 |     |    |              |                              |                        |
| Prefrontal                                    | TD>ASD   | No Significant Differences   | --              | --  | -- | --           | --                           | --                     |
|                                               | ASD>TD   | No Significant Differences   | --              | --  | -- | --           | --                           | --                     |
| Motor                                         | TD>ASD   | No Significant Differences   | --              | --  | -- | --           | --                           | --                     |
|                                               | ASD>TD   | R. Ventral Lateral Nucleus   | 16              | -6  | 16 | 4.51         | .036                         | 10                     |
|                                               |          | L. Anterior Nucleus          | -10             | -8  | 14 | 3.79         | .045                         | 9                      |
| Somatosensory                                 | TD>ASD   | No Significant Differences   | --              | --  | -- | --           | --                           | --                     |
|                                               | ASD>TD   | No Significant Differences   | --              | --  | -- | --           | --                           | --                     |
| Temporal                                      | TD>ASD   | No Significant Differences   | --              | --  | -- | --           | --                           | --                     |
|                                               | ASD>TD   | No Significant Differences   | --              | --  | -- | --           | --                           | --                     |
| Posterior Parietal                            | TD>ASD   | No Significant Differences   | --              | --  | -- | --           | --                           | --                     |
|                                               | ASD>TD   | No Significant Differences   | --              | --  | -- | --           | --                           | --                     |
| Occipital                                     | TD>ASD   | No Significant Differences   | --              | --  | -- | --           | --                           | --                     |
|                                               | ASD>TD   | No Significant Differences   | --              | --  | -- | --           | --                           | --                     |

\* Voxel size = 2 x 2 x 2 mm

Abbreviations: ASD=Autism Spectrum Disorder; FWE-corr=Family-wise Error Corrected; L=Left; MNI=Montreal Neurological Institute; R=Right; TD=Typically Developing; VA=Ventral Anterior; VLP=Ventral Lateral Posterior; VPL=Ventral Posterior Lateral

Supplemental Table S5. Thalamocortical functional connectivity changes in ASD by age: thalamic seed-based analysis

| Thalamic Seed                                 | Contrast (Voxels)* | Cluster Size | Cluster-Level $P_{FWE-corr}$ | MNI Coordinates |     |      | Peak T-value                       | Brain Region                       |
|-----------------------------------------------|--------------------|--------------|------------------------------|-----------------|-----|------|------------------------------------|------------------------------------|
|                                               |                    |              |                              | X               | Y   | Z    |                                    |                                    |
| Children/Young Adolescents (age 6-13.27 yrs.) |                    |              |                              |                 |     |      |                                    |                                    |
| Prefrontal                                    | TD>ASD             |              |                              |                 |     |      |                                    | No Significant Differences         |
|                                               | ASD>TD             |              |                              |                 |     |      |                                    | No Significant Differences         |
| Motor                                         | TD>ASD             |              |                              |                 |     |      |                                    | No Significant Differences         |
|                                               | ASD>TD             |              |                              |                 |     |      |                                    | No Significant Differences         |
| Somatosensory                                 | TD>ASD             |              |                              |                 |     |      |                                    | No Significant Differences         |
|                                               | ASD>TD             |              |                              |                 |     |      |                                    | No Significant Differences         |
| Temporal                                      | TD>ASD             |              |                              |                 |     |      |                                    | No Significant Differences         |
|                                               | ASD>TD             |              |                              |                 |     |      |                                    | No Significant Differences         |
| Posterior Parietal                            | TD>ASD             |              |                              |                 |     |      |                                    | No Significant Differences         |
|                                               | ASD>TD             |              |                              |                 |     |      |                                    | No Significant Differences         |
| Occipital                                     | TD>ASD             |              |                              |                 |     |      |                                    | No Significant Differences         |
|                                               | ASD>TD             |              |                              |                 |     |      |                                    | No Significant Differences         |
| Older Adolescents (age 13.28-18.00 yrs.)      |                    |              |                              |                 |     |      |                                    |                                    |
| Prefrontal                                    | TD>ASD             |              |                              |                 |     |      |                                    | No Significant Differences         |
|                                               | ASD>TD             |              |                              |                 |     |      |                                    | No Significant Differences         |
| Motor                                         | TD>ASD             |              |                              |                 |     |      |                                    | No Significant Differences         |
|                                               | ASD>TD             | 179          | .037                         | 48              | -2  | 60   | 4.66                               | R. Precentral Gyrus (BA 6)         |
|                                               |                    | 194          | .028                         | 56              | 2   | 38   | 4.41                               | R. Precentral Gyrus (BA 6)         |
|                                               |                    | 249          | .011                         | -26             | -42 | 72   | 4.29                               | L. Superior Parietal Lobule (BA 7) |
|                                               |                    | 262          | .009                         | -62             | -34 | 22   | 4.29                               | L. Superior Temporal Gyrus (BA 42) |
|                                               |                    | 239          | .013                         | 50              | 14  | -22  | 4.26                               | R. Superior Temporal Gyrus (BA 38) |
|                                               |                    | 167          | .046                         | -46             | -6  | 54   | 4.20                               | L. Precentral Gyrus (BA 4)         |
|                                               | 333                | .003         | -56                          | 6               | 2   | 4.05 | L. Superior Temporal Gyrus (BA 22) |                                    |
| Somatosensory                                 | TD>ASD             |              |                              |                 |     |      |                                    | No Significant Differences         |
|                                               | ASD>TD             |              |                              |                 |     |      |                                    | No Significant Differences         |
| Temporal                                      | TD>ASD             |              |                              |                 |     |      |                                    | No Significant Differences         |
|                                               | ASD>TD             | 340          | .003                         | -58             | -32 | 2    | 4.24                               | L. Middle Temporal Gyrus (BA 22)   |
| Posterior Parietal                            | TD>ASD             | 155          | .029                         | -2              | -22 | 6    | 4.22                               | L. Thalamus                        |
|                                               | ASD>TD             |              |                              |                 |     |      |                                    | No Significant Differences         |
| Occipital                                     | TD>ASD             |              |                              |                 |     |      |                                    | No Significant Differences         |
|                                               | ASD>TD             |              |                              |                 |     |      |                                    | No Significant Differences         |
| Adults (age 18.01+ yrs.)                      |                    |              |                              |                 |     |      |                                    |                                    |
| Prefrontal                                    | TD>ASD             |              |                              |                 |     |      |                                    | No Significant Differences         |
|                                               | ASD>TD             |              |                              |                 |     |      |                                    | No Significant Differences         |
| Motor                                         | TD>ASD             |              |                              |                 |     |      |                                    | No Significant Differences         |
|                                               | ASD>TD             |              |                              |                 |     |      |                                    | No Significant Differences         |
| Somatosensory                                 | TD>ASD             |              |                              |                 |     |      |                                    | No Significant Differences         |
|                                               | ASD>TD             |              |                              |                 |     |      |                                    | No Significant Differences         |
| Temporal                                      | TD>ASD             |              |                              |                 |     |      |                                    | No Significant Differences         |
|                                               | ASD>TD             | 239          | .013                         | -60             | -58 | 14   | 4.09                               | L. Middle Temporal Gyrus (BA 39)   |
| Posterior Parietal                            | TD>ASD             |              |                              |                 |     |      |                                    | No Significant Differences         |
|                                               | ASD>TD             |              |                              |                 |     |      |                                    | No Significant Differences         |
| Occipital                                     | TD>ASD             |              |                              |                 |     |      |                                    | No Significant Differences         |
|                                               | ASD>TD             |              |                              |                 |     |      |                                    | No Significant Differences         |

\* Voxel size = 2 x 2 x 2 mm

Abbreviations: ASD=Autism Spectrum Disorder; BA=Brodmann Area; FWE-corr=Family-wise Error Corrected; L=Left; MNI=Montreal Neurological Institute; R=Right; TD=Typically Developing

Supplemental Table S6. Correlation between clinical variables in ASD and functional connectivity extracted from the clusters identified in the cortical seed-based between group analysis.

| Cortical Seed | Contrast  | Cluster*            |                     | ADOS   |               |                         | SRS         | FSIQ        |
|---------------|-----------|---------------------|---------------------|--------|---------------|-------------------------|-------------|-------------|
|               |           |                     |                     | Social | Communication | Stereotypical Behaviors | Total Score |             |
| Prefrontal    | ASD>TD    | 6 -26 10            | Pearson Correlation | -.090  | -.130         | -.081                   | .080        | .043        |
|               |           |                     | Sig. (2-tailed)     | .256   | .102          | .326                    | .371        | .523        |
|               |           |                     | N                   | 160    | 160           | 149                     | 128         | 224         |
| Motor         | ASD>TD    | -14 -6 10           | Pearson Correlation | .035   | .128          | .028                    | -.001       | -.158       |
|               |           |                     | Sig. (2-tailed)     | .662   | .108          | .736                    | .987        | <b>.018</b> |
|               |           |                     | N                   | 160    | 160           | 149                     | 128         | <b>224</b>  |
|               | ASD>TD    | 14 -6 12            | Pearson Correlation | -.027  | .034          | .105                    | .043        | -.040       |
|               |           |                     | Sig. (2-tailed)     | .734   | .667          | .201                    | .631        | .552        |
|               |           |                     | N                   | 160    | 160           | 149                     | 128         | 224         |
| ASD>TD        | -14 -18 8 | Pearson Correlation | .080                | .110   | .017          | .010                    | -.124       |             |
|               |           | Sig. (2-tailed)     | .317                | .165   | .838          | .911                    | .063        |             |
|               |           | N                   | 160                 | 160    | 149           | 128                     | 224         |             |
| Somatosensory | ASD>TD    | 12 -16 2            | Pearson Correlation | .020   | .006          | -.009                   | .024        | -.048       |
|               |           |                     | Sig. (2-tailed)     | .800   | .942          | .917                    | .788        | .475        |
|               |           |                     | N                   | 160    | 160           | 149                     | 128         | 224         |
|               | ASD>TD    | -10 -16 -4          | Pearson Correlation | .018   | .010          | -.008                   | .143        | -.061       |
|               |           |                     | Sig. (2-tailed)     | .825   | .897          | .927                    | .108        | .364        |
|               |           |                     | N                   | 160    | 160           | 149                     | 128         | 224         |
| ASD>TD        | -14 -16 8 | Pearson Correlation | -.044               | -.094  | .035          | .071                    | -.044       |             |
|               |           | Sig. (2-tailed)     | .583                | .239   | .674          | .424                    | .514        |             |
|               |           | N                   | 160                 | 160    | 149           | 128                     | 224         |             |
| Temporal      | ASD>TD    | 6 -24 8             | Pearson Correlation | .069   | .078          | .109                    | .013        | .003        |
|               |           |                     | Sig. (2-tailed)     | .385   | .327          | .186                    | .888        | .963        |
|               |           |                     | N                   | 160    | 160           | 149                     | 128         | 224         |

\*MNI Coordinates of cluster identified in between group analysis.

Supplemental Table S7. Correlation between clinical variables in ASD and functional connectivity extracted from the clusters identified in the thalamic seed-based between group analysis.

| Thalamic Seed | Contrast   | Cluster*            | ADOS                |               |                         | SRS         |             | FSIQ        |
|---------------|------------|---------------------|---------------------|---------------|-------------------------|-------------|-------------|-------------|
|               |            |                     | Social              | Communication | Stereotypical Behaviors | Total Score |             |             |
| Prefrontal    | ASD>TD     | -52 -38 2           | Pearson Correlation | .064          | .048                    | .062        | .069        | -.025       |
|               |            |                     | Sig. (2-tailed)     | .421          | .548                    | .449        | .442        | .709        |
|               |            |                     | N                   | 160           | 160                     | 149         | 128         | 224         |
|               | ASD>TD     | 48 -32 -2           | Pearson Correlation | .040          | .035                    | .077        | .106        | -.086       |
|               |            |                     | Sig. (2-tailed)     | .615          | .662                    | .349        | .236        | .198        |
|               |            |                     | N                   | 160           | 160                     | 149         | 128         | 224         |
| ASD>TD        | 60 -2 0    | Pearson Correlation | .052                | .006          | .004                    | .014        | -.023       |             |
|               |            | Sig. (2-tailed)     | .513                | .941          | .963                    | .873        | .733        |             |
|               |            | N                   | 160                 | 160           | 149                     | 128         | 224         |             |
| Motor         | TD>ASD     | -4 -22 10           | Pearson Correlation | .008          | .051                    | -.155       | -.113       | -.043       |
|               |            |                     | Sig. (2-tailed)     | .919          | .520                    | .059        | .203        | .521        |
|               |            |                     | N                   | 160           | 160                     | 149         | 128         | 224         |
|               | ASD>TD     | -54 -48 18          | Pearson Correlation | .008          | .121                    | .005        | .106        | -.044       |
|               |            |                     | Sig. (2-tailed)     | .921          | .129                    | .951        | .232        | .515        |
|               |            |                     | N                   | 160           | 160                     | 149         | 128         | 224         |
|               | ASD>TD     | 48 -32 8            | Pearson Correlation | -.011         | .029                    | .081        | <b>.184</b> | -.001       |
|               |            |                     | Sig. (2-tailed)     | .890          | .718                    | .325        | <b>.038</b> | .984        |
|               |            |                     | N                   | 160           | 160                     | 149         | <b>128</b>  | 224         |
|               | ASD>TD     | 8 10 34             | Pearson Correlation | .142          | .104                    | -.015       | .119        | -.011       |
|               |            |                     | Sig. (2-tailed)     | .074          | .193                    | .856        | .180        | .865        |
|               |            |                     | N                   | 160           | 160                     | 149         | 128         | 224         |
|               | ASD>TD     | 64 -14 8            | Pearson Correlation | -.019         | -.060                   | -.050       | .051        | .080        |
|               |            |                     | Sig. (2-tailed)     | .816          | .450                    | .548        | .569        | .232        |
|               |            |                     | N                   | 160           | 160                     | 149         | 128         | 224         |
| ASD>TD        | 24 -4 74   | Pearson Correlation | .082                | .116          | .083                    | -.061       | -.010       |             |
|               |            | Sig. (2-tailed)     | .304                | .145          | .315                    | .491        | .885        |             |
|               |            | N                   | 160                 | 160           | 149                     | 128         | 224         |             |
| ASD>TD        | -46 -12 56 | Pearson Correlation | -.023               | -.048         | -.072                   | -.044       | -.029       |             |
|               |            | Sig. (2-tailed)     | .771                | .546          | .382                    | .618        | .663        |             |
|               |            | N                   | 160                 | 160           | 149                     | 128         | 224         |             |
| ASD>TD        | -16 -46 62 | Pearson Correlation | -.025               | .059          | -.045                   | .098        | -.050       |             |
|               |            | Sig. (2-tailed)     | .754                | .460          | .589                    | .274        | .458        |             |
|               |            | N                   | 160                 | 160           | 149                     | 128         | 224         |             |
| Temporal      | ASD>TD     | -60 -54 14          | Pearson Correlation | -.001         | .041                    | .082        | .138        | .040        |
|               |            |                     | Sig. (2-tailed)     | .986          | .607                    | .318        | .120        | .549        |
|               |            |                     | N                   | 160           | 160                     | 149         | 128         | 224         |
|               | ASD>TD     | 54 -56 14           | Pearson Correlation | .058          | .043                    | .134        | .140        | -.023       |
|               |            |                     | Sig. (2-tailed)     | .464          | .585                    | .104        | .114        | .732        |
|               |            |                     | N                   | 160           | 160                     | 149         | 128         | 224         |
| Parietal      | TD>ASD     | -8 -14 4            | Pearson Correlation | -.028         | .103                    | -.100       | -.119       | -.148       |
|               |            |                     | Sig. (2-tailed)     | .725          | .193                    | .224        | .182        | <b>.026</b> |
|               |            |                     | N                   | 160           | 160                     | 149         | 128         | <b>224</b>  |
|               | ASD>TD     | -60 -58 16          | Pearson Correlation | -.017         | .087                    | -.052       | -.051       | -.005       |
|               |            |                     | Sig. (2-tailed)     | .835          | .274                    | .530        | .571        | .940        |
|               |            |                     | N                   | 160           | 160                     | 149         | 128         | 224         |

\*MNI Coordinates of cluster identified in between group analysis.



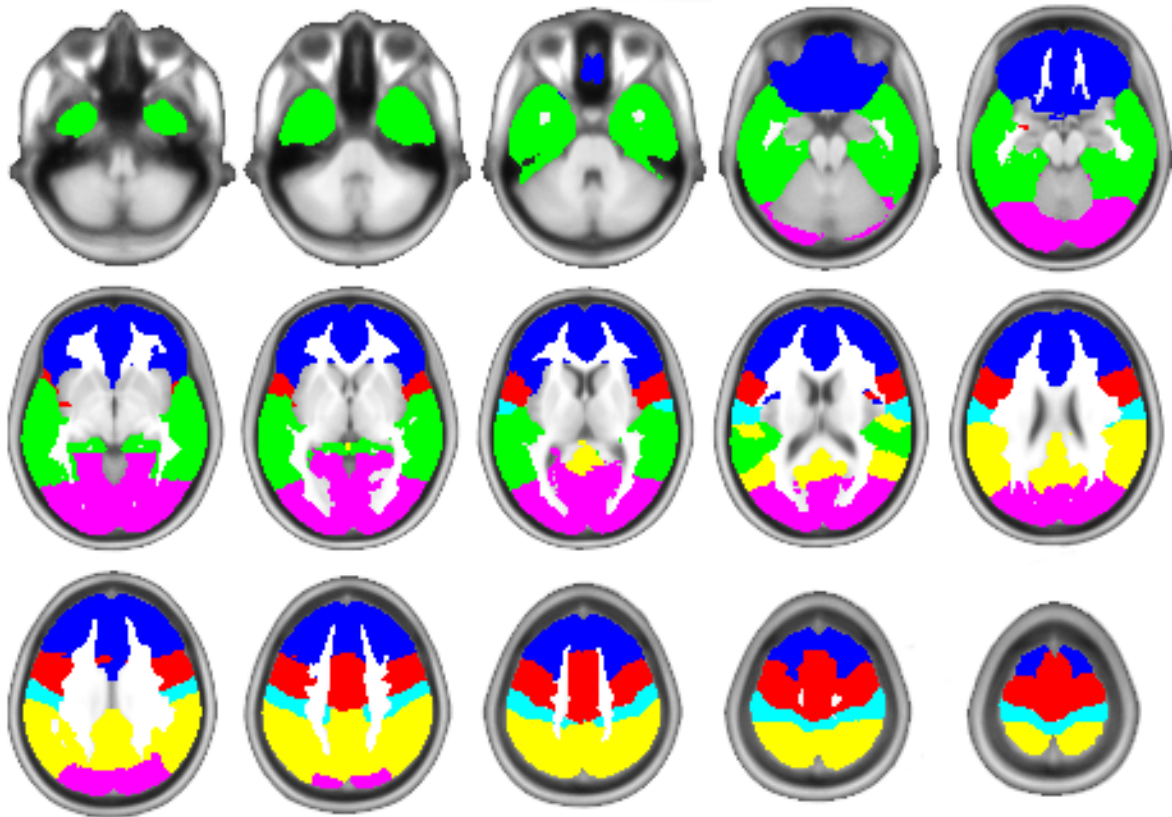

Supplemental Figure S1. Cortical regions-of-interest (ROIs) overlaid on the standard MNI152 template brain. Regions-of-interest were used as seeds in the cortex seed-based analysis of thalamocortical functional connectivity. ROIs are color coded as follows: blue=prefrontal cortex; red=motor/supplementary motor area; cyan=somatosensory cortex; green=temporal lobe; yellow=posterior parietal cortex; violet=occipital cortex.

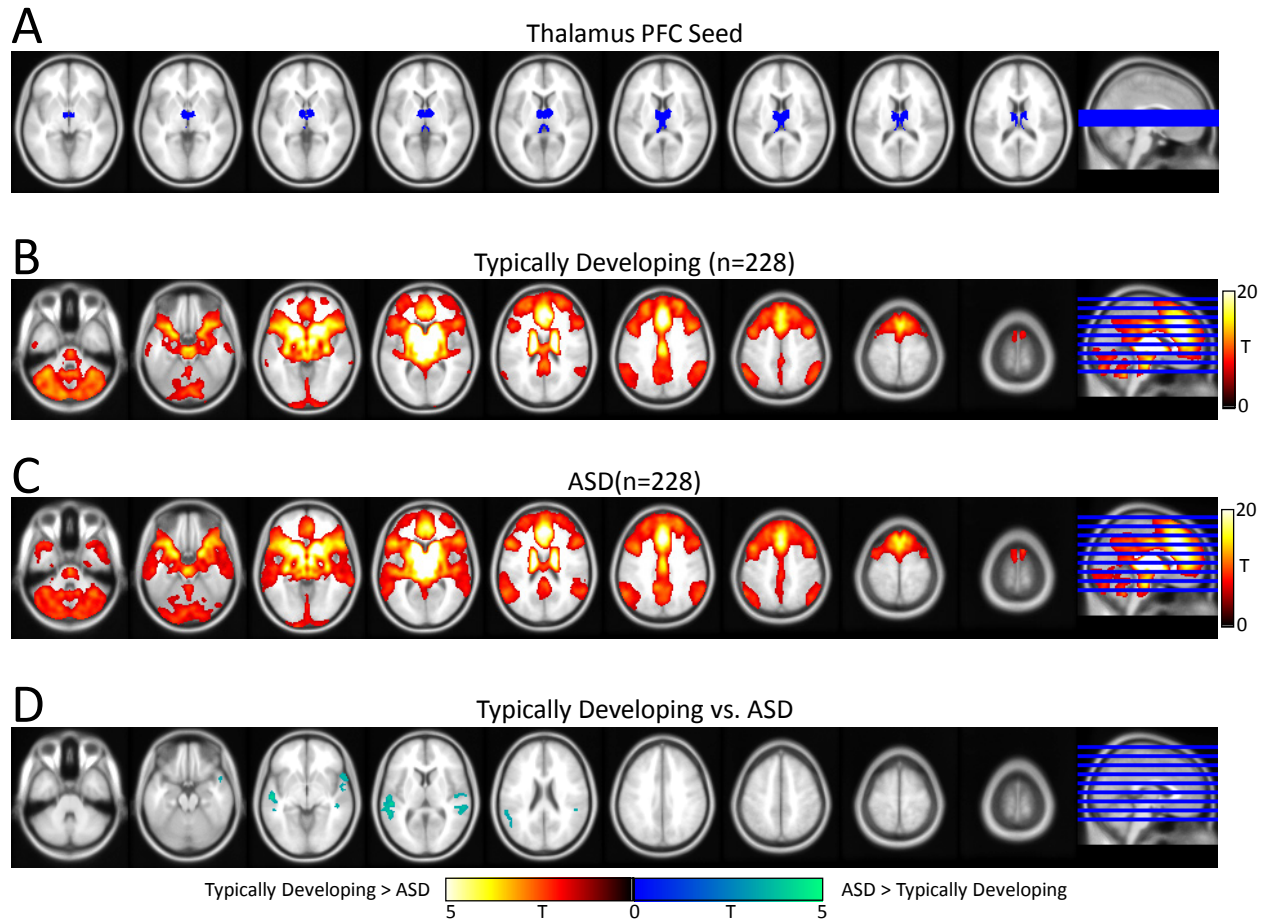

Supplemental Figure S2. Functional connectivity of the thalamus prefrontal cortex (PFC) seed in typically developing individuals and autism spectrum disorder (ASD). Panel A: Location of the thalamus PFC seed, shown in blue. Panel B: Functional connectivity of the thalamus PFC seed in typically developing individuals. Panel C: Functional connectivity of the thalamus PFC seed in ASD. Panel D: Differences in thalamus PFC seed functional connectivity between typically developing individuals and ASD. Panels B and C thresholded at whole-brain Family-wise error corrected voxel-wise  $p_{(FWE)}=.001$ . Panel D thresholded at whole-brain cluster-level corrected  $p_{(FWE)}=.05$  for voxel-wise  $p_{(uncorrected)}=.001$ . Locations of axial slices are shown (in blue) on the sagittal image on the far left side of each panel. Axial images are displayed in neurological format (i.e. left side of brain on left side of image).

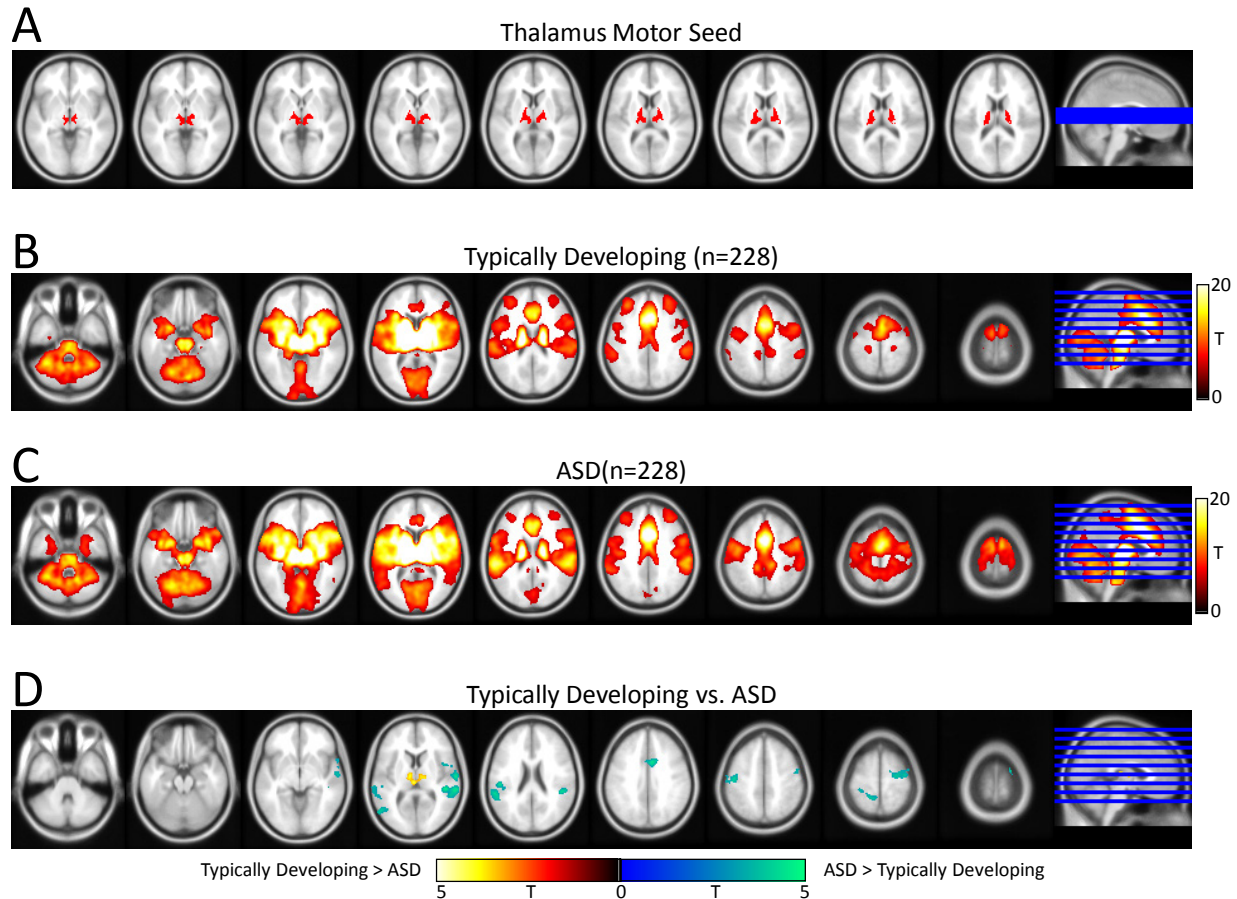

Supplemental Figure S3. Functional connectivity of the thalamus motor cortex seed in typically developing individuals and autism spectrum disorder (ASD). Panel A: Location of the thalamus motor seed, shown in red. Panel B: Functional connectivity of the thalamus motor seed in typically developing individuals. Panel C: Functional connectivity of the thalamus motor seed in ASD. Panel D: Differences in thalamus motor seed functional connectivity between typically developing individuals and ASD. Panels B and C thresholded at whole-brain Family-wise error corrected voxel-wise  $p_{(FWE)}=.001$ . Panel D thresholded at whole-brain cluster-level corrected  $p_{(FWE)}=.05$  for voxel-wise  $p_{(uncorrected)}=.001$ . Locations of axial slices are shown (in blue) on the sagittal image on the far left side of each panel. Axial images are displayed in neurological format (i.e. left side of brain on left side of image).

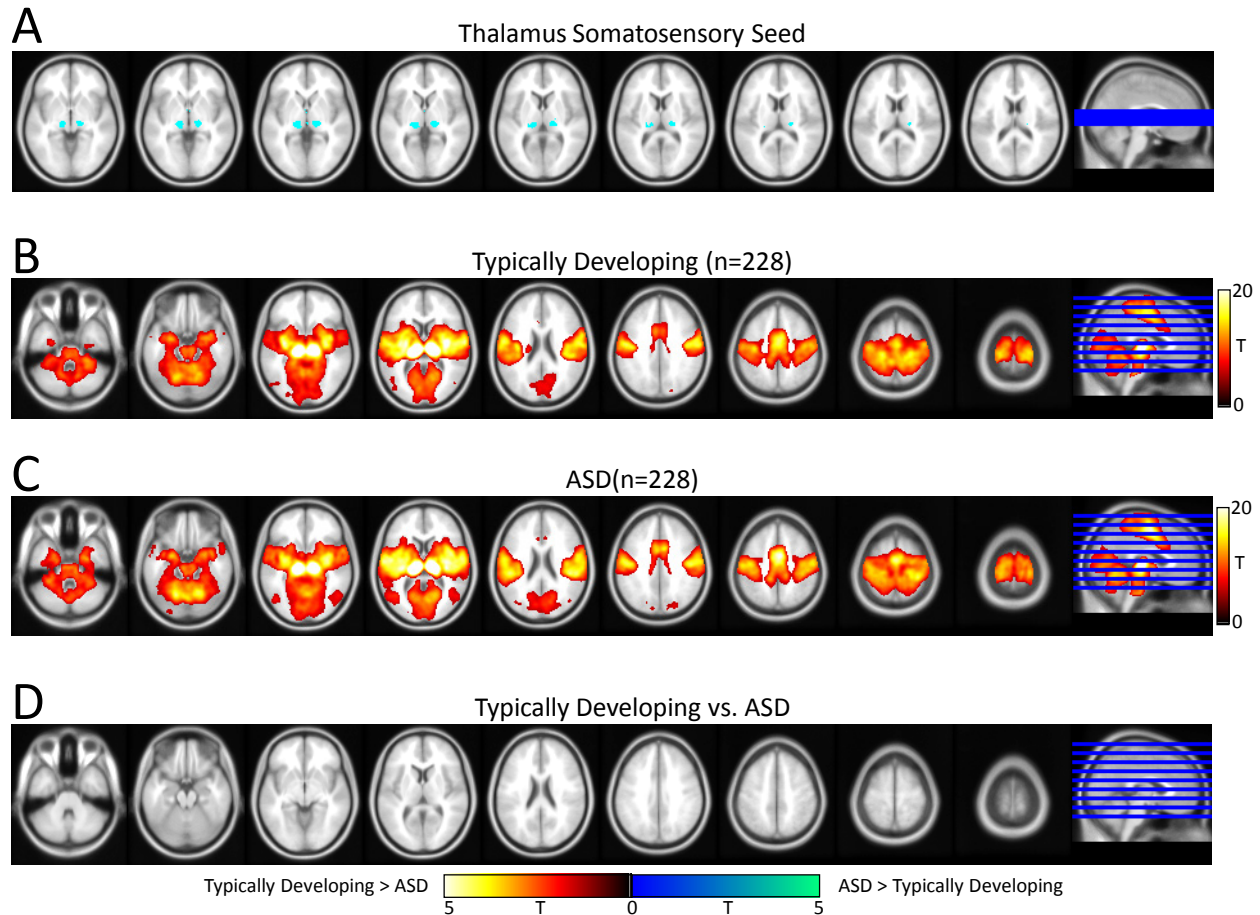

Supplemental Figure S4. Functional connectivity of the thalamus somatosensory cortex seed in typically developing individuals and autism spectrum disorder (ASD). Panel A: Location of the thalamus somatosensory seed, shown in cyan. Panel B: Functional connectivity of the thalamus somatosensory seed in typically developing individuals. Panel C: Functional connectivity of the thalamus somatosensory seed in ASD. Panel D: Differences in thalamus somatosensory seed functional connectivity between typically developing individuals and ASD. Panels B and C thresholded at whole-brain Family-wise error corrected voxel-wise  $p_{(FWE)}=.001$ . Panel D thresholded at whole-brain cluster-level corrected  $p_{(FWE)}=.05$  for voxel-wise  $p_{(uncorrected)}=.001$ . Locations of axial slices are shown (in blue) on the sagittal image on the far left side of each panel. Axial images are displayed in neurological format (i.e. left side of brain on left side of image).



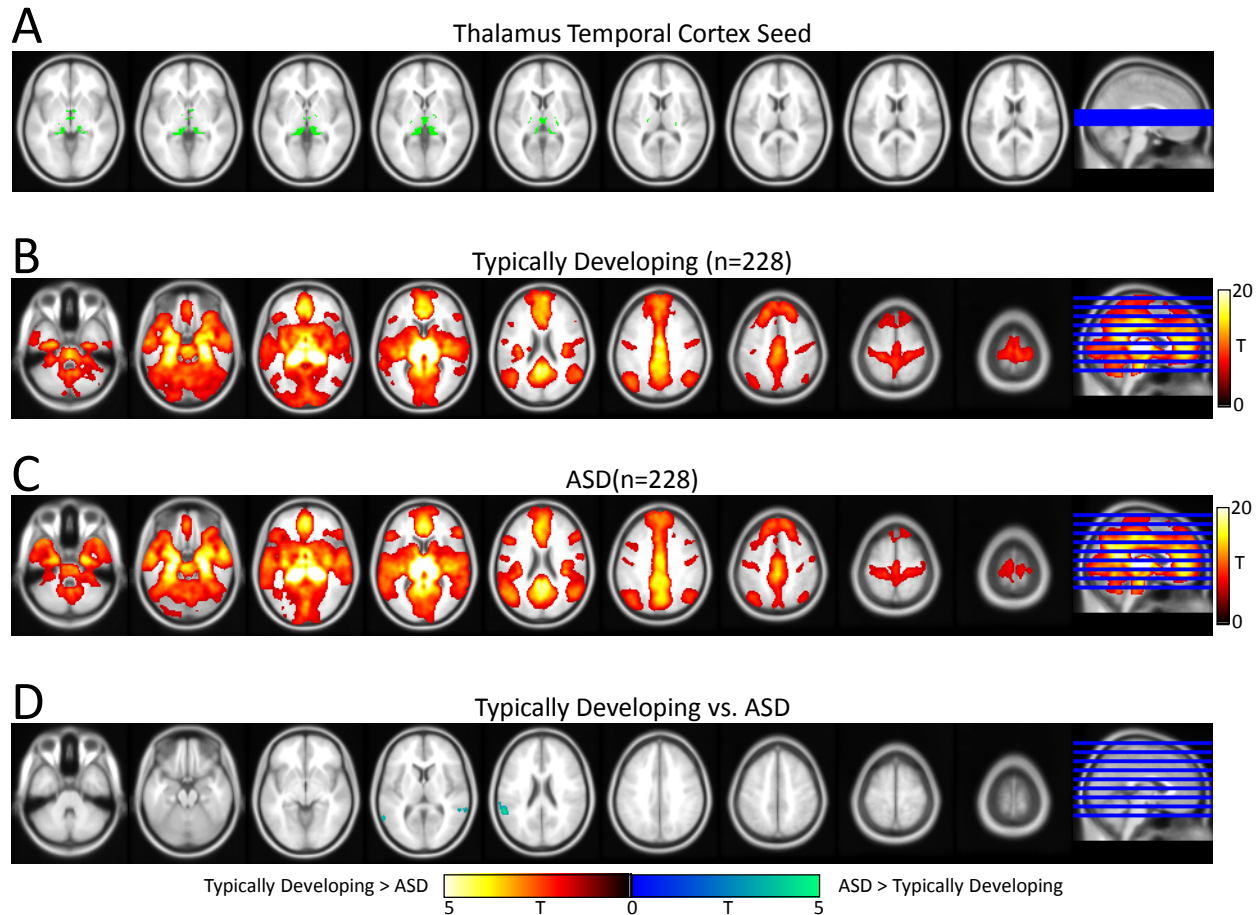

Supplemental Figure S5. Functional connectivity of the thalamus temporal cortex seed in typically developing individuals and autism spectrum disorder (ASD). Panel A: Location of the thalamus temporal seed, shown in green. Panel B: Functional connectivity of the thalamus temporal cortex seed in typically developing individuals. Panel C: Functional connectivity of the thalamus temporal cortex seed in ASD. Panel D: Differences in thalamus temporal cortex seed functional connectivity between typically developing individuals and ASD. Panels B and C thresholded at whole-brain Family-wise error corrected voxel-wise  $p_{(FWE)}=.001$ . Panel D thresholded at whole-brain cluster-level corrected  $p_{(FWE)}=.05$  for voxel-wise  $p_{(uncorrected)}=.001$ . Locations of axial slices are shown (in blue) on the sagittal image on the far left side of each panel. Axial images are displayed in neurological format (i.e. left side of brain on left side of image).

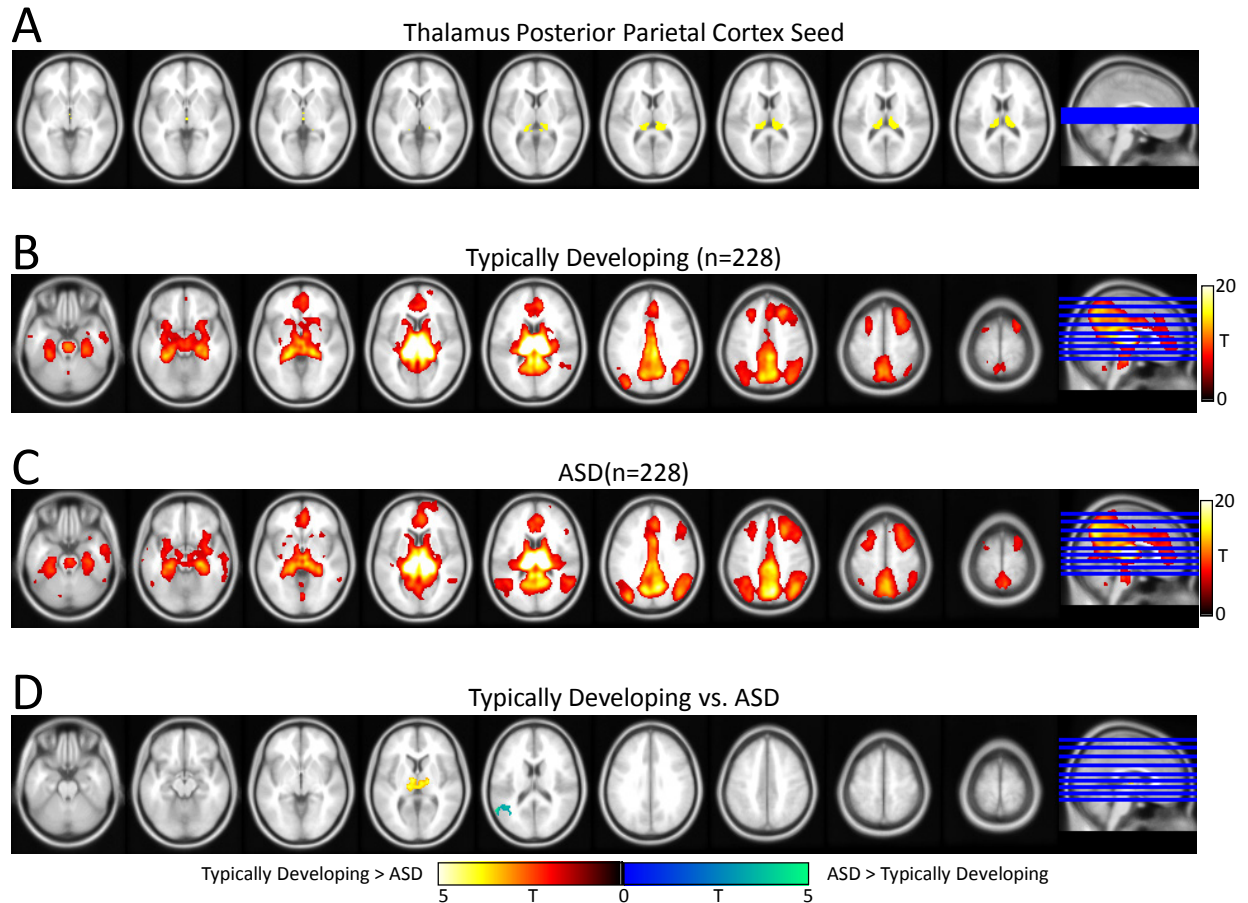

Supplemental Figure S6. Functional connectivity of the thalamus posterior parietal cortex seed in typically developing individuals and autism spectrum disorder (ASD). Panel A: Location of the thalamus posterior parietal cortex seed, shown in green. Panel B: Functional connectivity of the thalamus posterior parietal cortex seed in typically developing individuals. Panel C: Functional connectivity of the thalamus posterior parietal cortex seed in ASD. Panel D: Differences in thalamus posterior parietal cortex seed functional connectivity between typically developing individuals and ASD. Panels B and C thresholded at whole-brain Family-wise error corrected voxel-wise  $p_{(FWE)}=.001$ . Panel D thresholded at whole-brain cluster-level corrected  $p_{(FWE)}=.05$  for voxel-wise  $p_{(uncorrected)}=.001$ . Locations of axial slices are shown (in blue) on the sagittal image on the far left side of each panel. Axial images are displayed in neurological format (i.e. left side of brain on left side of image).

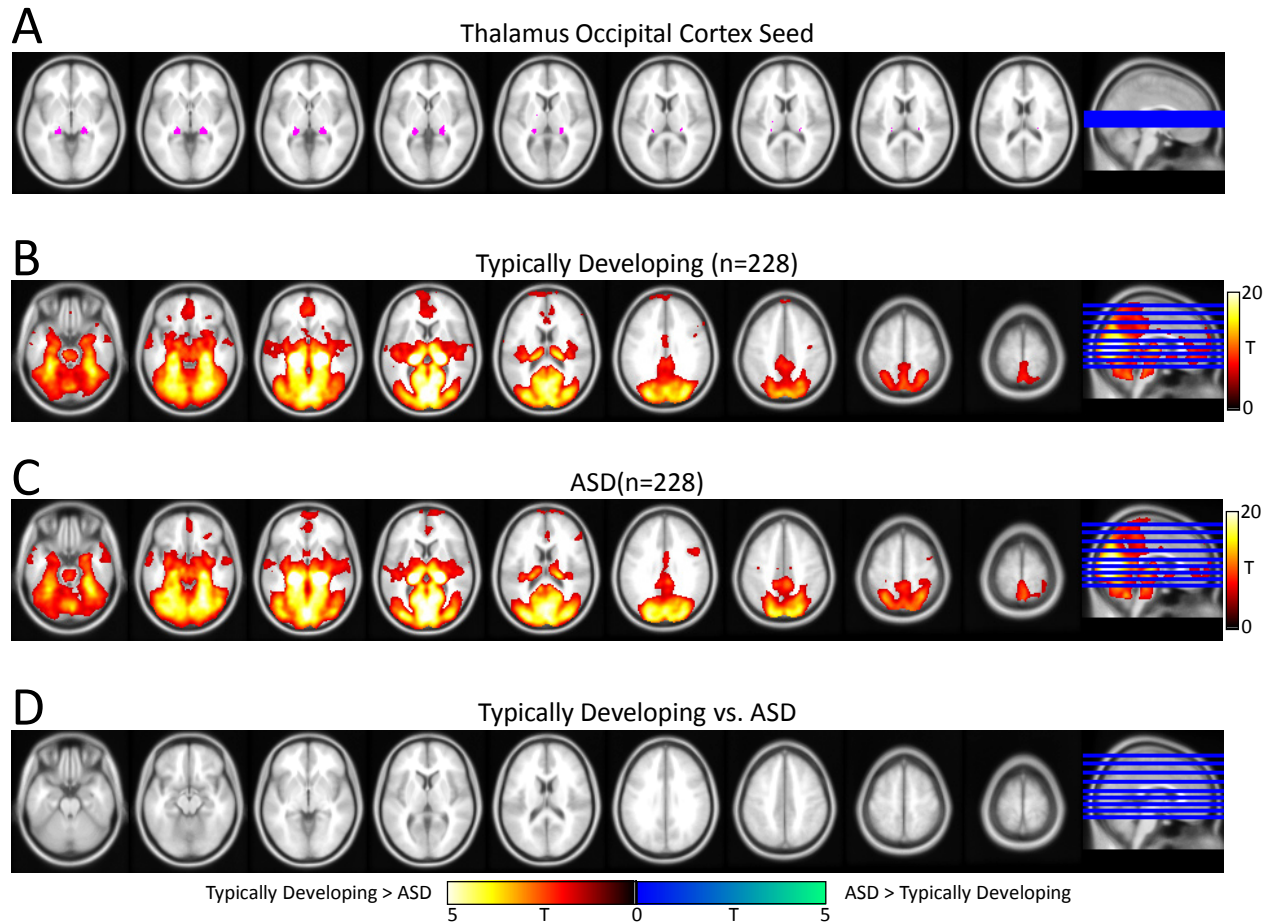

Supplemental Figure S7. Functional connectivity of the thalamus occipital cortex seed in typically developing individuals and autism spectrum disorder (ASD). Panel A: Location of the thalamus occipital cortex seed, shown in green. Panel B: Functional connectivity of the thalamus occipital cortex seed in typically developing individuals. Panel C: Functional connectivity of the thalamus occipital cortex seed in ASD. Panel D: Differences in thalamus occipital cortex seed functional connectivity between typically developing individuals and ASD. Panels B and C thresholded at whole-brain Family-wise error corrected voxel-wise  $p_{(FWE)}=.001$ . Panel D thresholded at whole-brain cluster-level corrected  $p_{(FWE)}=.05$  for voxel-wise  $p_{(uncorrected)}=.001$ . Locations of axial slices are shown (in blue) on the sagittal image on the far left side of each panel. Axial images are displayed in neurological format (i.e. left side of brain on left side of image).

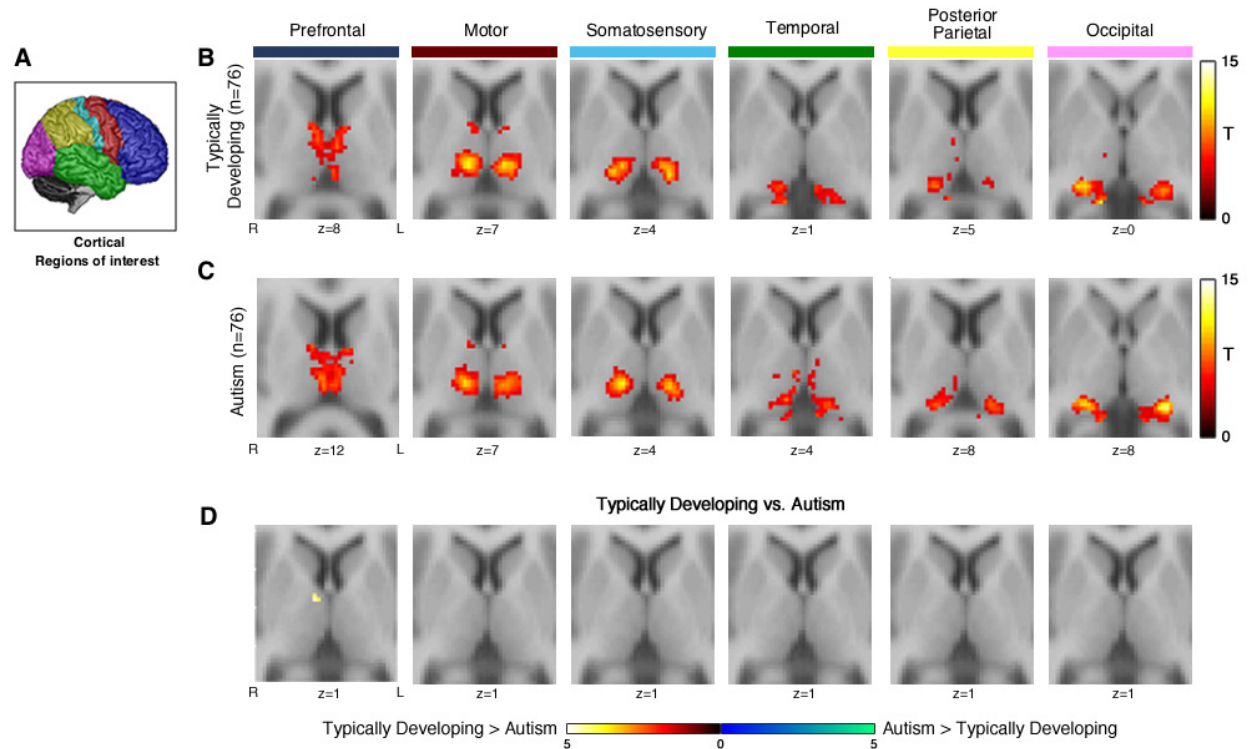

Supplemental Figure S8. Cortical seed-based analysis of thalamocortical functional connectivity in children/young adolescents (age 6-13.27 years) with autism spectrum disorder. Panel A: The cortex was partitioned into 6 non-overlapping regions-of-interest (ROIs) that were used as seeds in a seed-based functional connectivity analysis. Panel B and C: Functional connectivity of cortical seeds in typically developing individuals and autism spectrum disorder. Panel D: Group differences in cortical connectivity with the thalamus. Prefrontal cortex connectivity with the thalamus was decreased in autism spectrum disorder. Panels B-D thresholded at cluster-level Family-wise error corrected  $p_{(FWE)}=.05$  for voxel-wise  $p_{(uncorrected)}=.001$ .



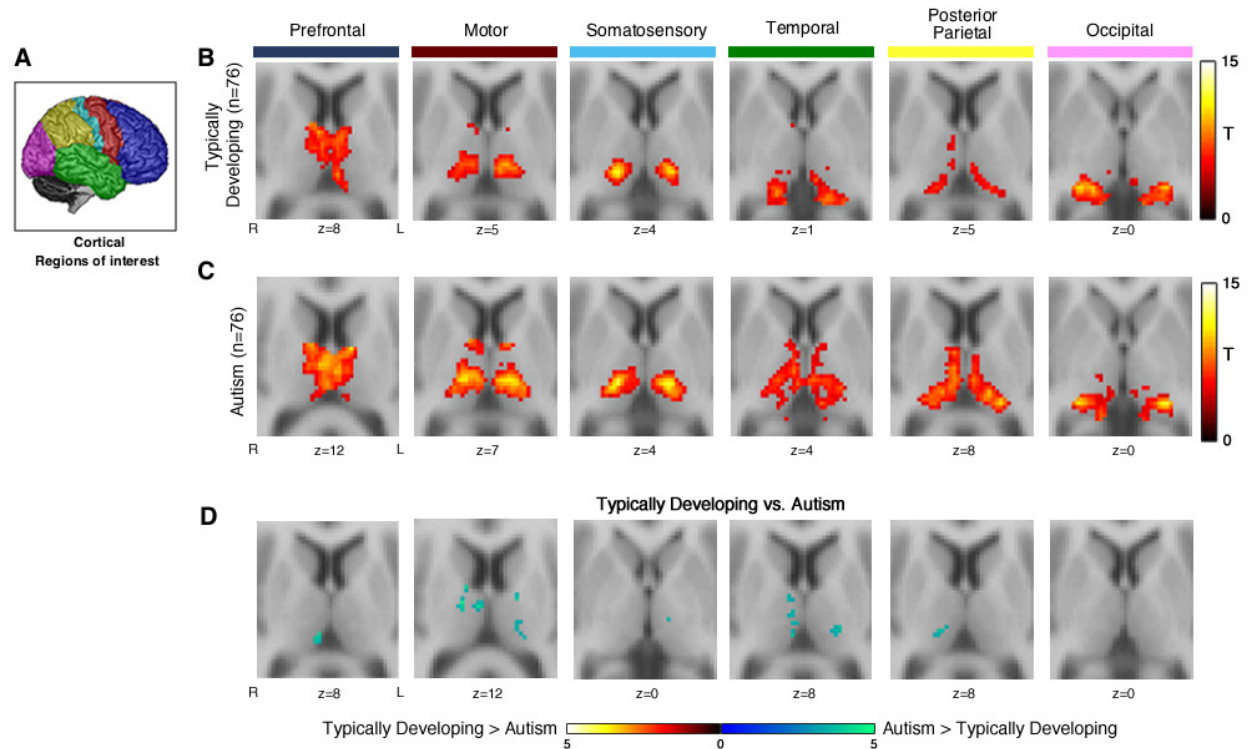

Supplemental Figure S9. Cortical seed-based analysis of thalamocortical functional connectivity in older adolescents (age 13.28-18.00 years) with autism spectrum disorder. Panel A: The cortex was partitioned into 6 non-overlapping regions-of-interest (ROIs) that were used as seeds in a seed-based functional connectivity analysis. Panel B and C: Functional connectivity of cortical seeds in typically developing individuals and autism spectrum disorder. Panel D: Group differences in cortical connectivity with the thalamus. Prefrontal, motor, somatosensory, temporal, and posterior parietal seeds exhibited increased connectivity with the thalamus in autism spectrum disorder. Panels B-D thresholded at cluster-level Family-wise error corrected  $p_{(FWE)}=.05$  for voxel-wise  $p_{(uncorrected)}=.001$ .

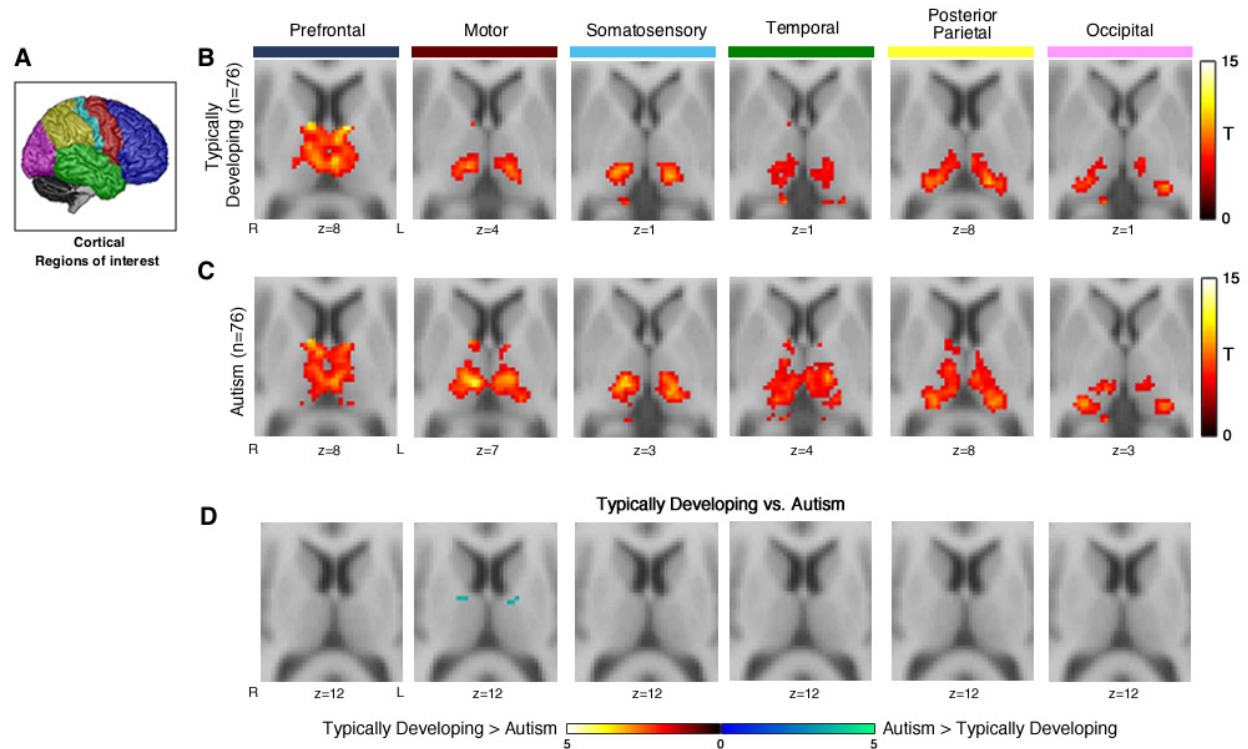

Supplemental Figure S10. Cortical seed-based analysis of thalamocortical functional connectivity in adults (age 18.01+ years) with autism spectrum disorder. Panel A: The cortex was partitioned into 6 non-overlapping regions-of-interest (ROIs) that were used as seeds in a seed-based functional connectivity analysis. Panel B and C: Functional connectivity of cortical seeds in typically developing individuals and autism spectrum disorder. Panel D: Group differences in cortical connectivity with the thalamus. Motor cortex connectivity with the thalamus was increased in autism spectrum disorder. Panels B-D thresholded at cluster-level Family-wise error corrected  $p_{(FWE)}=.05$  for voxel-wise  $p_{(uncorrected)}=.001$ .

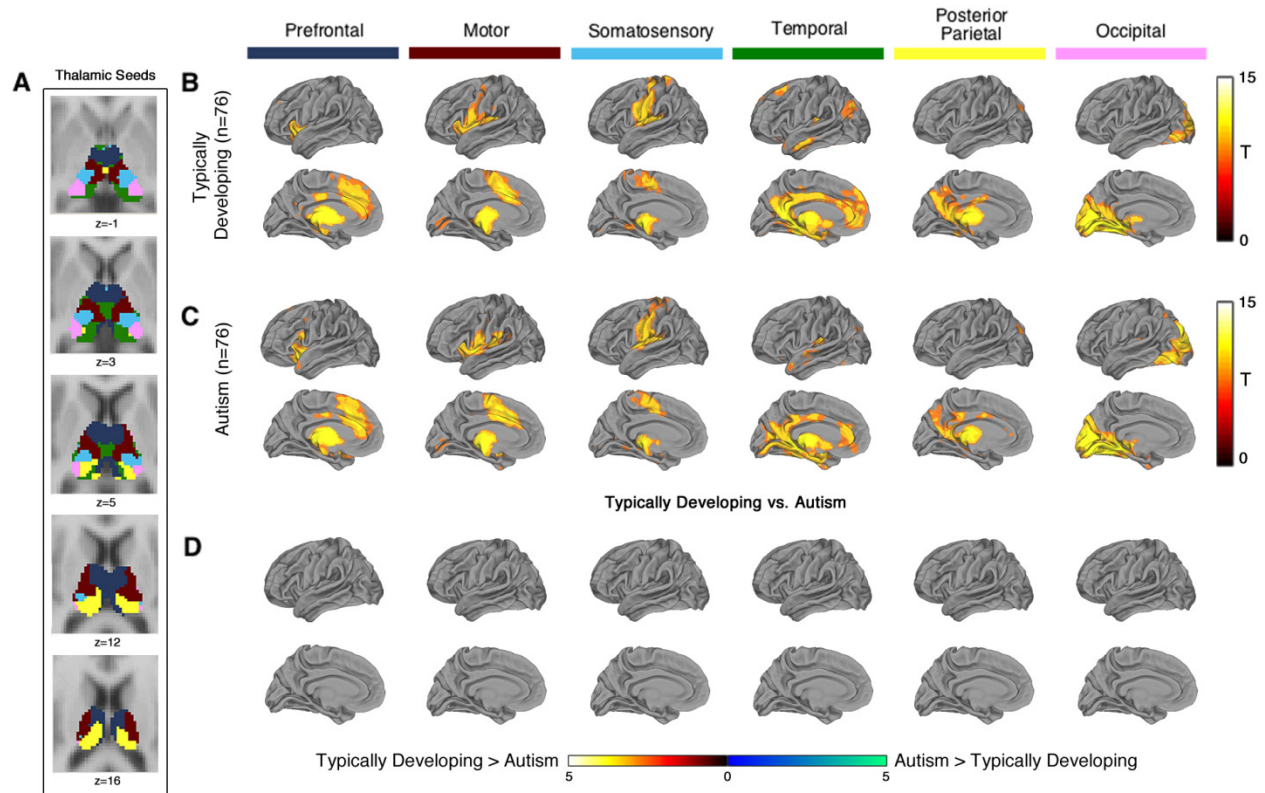

Supplemental Figure S11. Whole-brain functional connectivity of functionally-defined thalamic seeds in children/young adolescents (age 6-13.27 years) with autism spectrum disorder. Panel A: Using the entire dataset of 456 subjects, the thalamus was segmented for functional connectivity into functionally defined sub-regions using the ‘winner take all’ approach in which each voxel in the thalamus is color-coded based on which cortical region of interest (ROIs) it was most strongly connected to. These functionally-defined thalamic sub-regions were then used as seeds in a whole-brain functional connectivity analysis. Panels B and C: Functional connectivity of each thalamic sub-region seed in typically developing individuals and ASD. Panel D: Group differences in whole-brain functional connectivity of thalamic seeds. No group differences were detected in the children/young adolescent age band. Panels B and C thresholded at whole-brain voxel-level Family-wise error corrected  $p_{(FWE)}=.001$ . Panel D thresholded at whole-brain cluster-level Family-wise error corrected  $p_{(FWE)}=.05$  for voxel-wise  $p_{(uncorrected)}=.001$ .

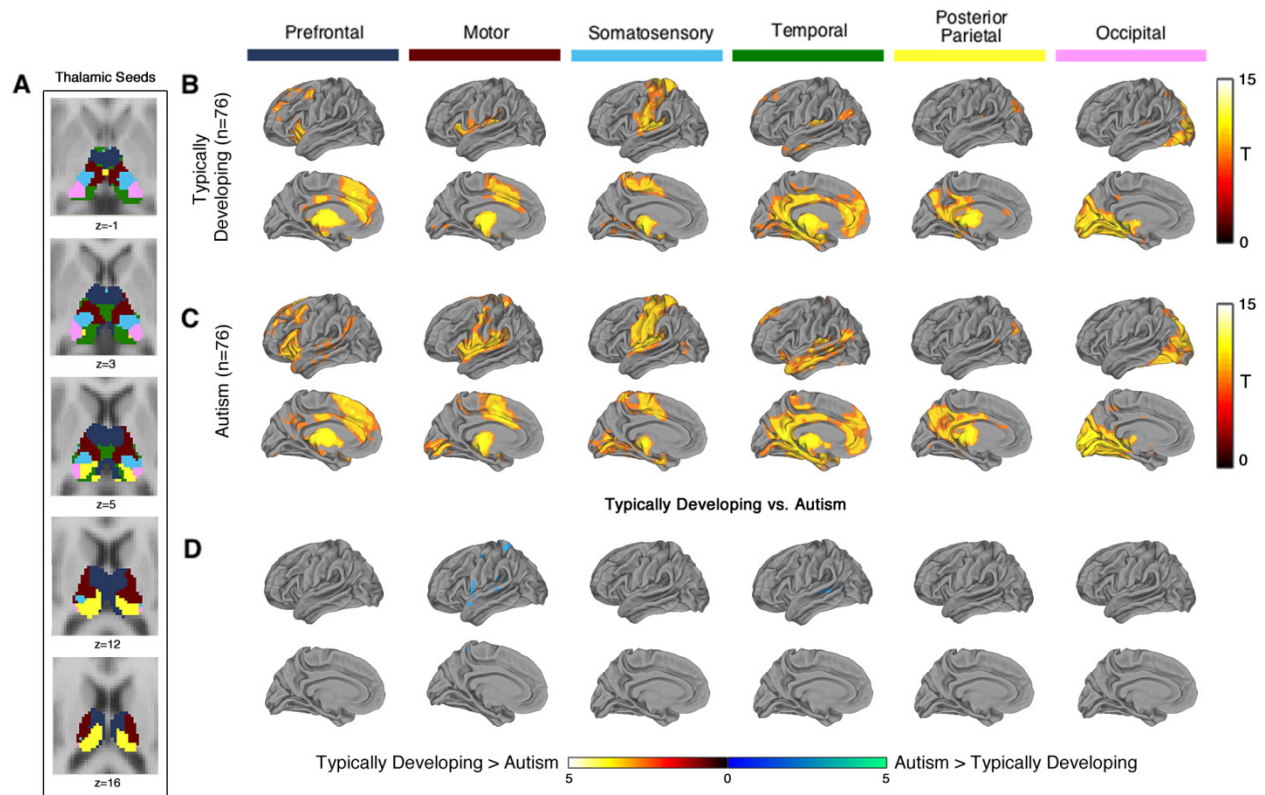

Supplemental Figure S12. Whole-brain functional connectivity of functionally-defined thalamic seeds in older adolescents (age 13.28-18.00 years) with autism spectrum disorder. Panel A: Using the entire dataset of 456 subjects, the thalamus was segmented for functional connectivity into functionally defined sub-regions using the ‘winner take all’ approach in which each voxel in the thalamus is color-coded based on which cortical region of interest (ROIs) it was most strongly connected to. These functionally-defined thalamic sub-regions were then used as seeds in a whole-brain functional connectivity analysis. Panels B and C: Functional connectivity of each thalamic sub-region seed in typically developing individuals and ASD. Panel D: Group differences in whole-brain functional connectivity of thalamic seeds. Thalamic motor and temporal seed functional connectivity was significantly increased in older adolescents with autism spectrum disorder. Panels B and C thresholded at whole-brain voxel-level Family-wise error corrected  $p_{(FWE)}=.001$ . Panel D thresholded at whole-brain cluster-level Family-wise error corrected  $p_{(FWE)}=.05$  for voxel-wise  $p_{(uncorrected)}=.001$ .

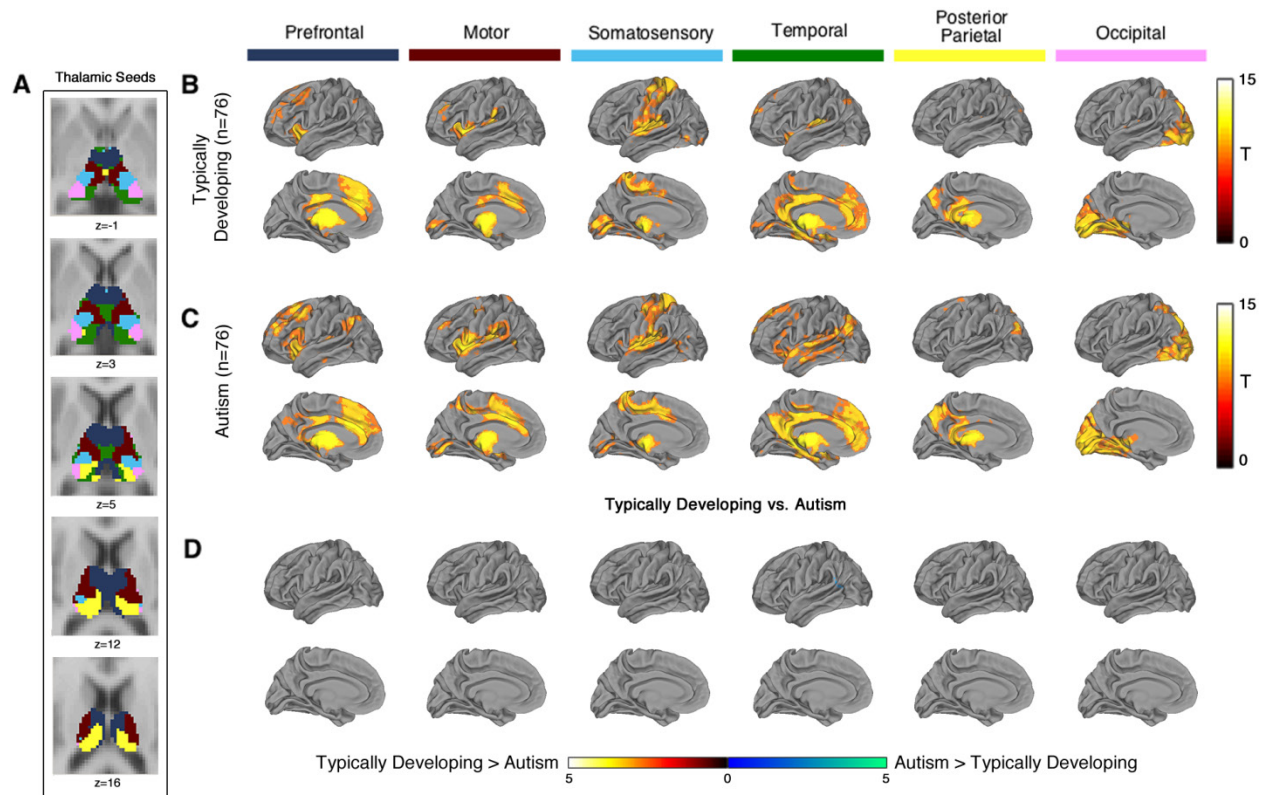

Supplemental Figure S13. Whole-brain functional connectivity of functionally-defined thalamic seeds in adults (age 18.01+ years) with autism spectrum disorder. Panel A: Using the entire dataset of 456 subjects, the thalamus was segmented for functional connectivity into functionally defined sub-regions using the ‘winner take all’ approach in which each voxel in the thalamus is color-coded based on which cortical region of interest (ROIs) it was most strongly connected to. These functionally-defined thalamic sub-regions were then used as seeds in a whole-brain functional connectivity analysis. Panels B and C: Functional connectivity of each thalamic sub-region seed in typically developing individuals and ASD. Panel D: Group differences in whole-brain functional connectivity of thalamic seeds. Panels B and C thresholded at whole-brain voxel-level Family-wise error corrected  $p_{(FWE)}=.001$ . Panel D thresholded at whole-brain cluster-level Family-wise error corrected  $p_{(FWE)}=.05$  for voxel-wise  $p_{(uncorrected)}=.001$ .

## Supplemental References

1. Woodward ND, Heckers S. Mapping Thalamocortical Functional Connectivity in Chronic and Early Stages of Psychotic Disorders. *Biol.Psychiatry* . 7-2-2015.
2. Woodward ND, Karbasforoushan H, Heckers S. Thalamocortical dysconnectivity in schizophrenia. *Am.J.Psychiatry* 169[10], 1092-1099. 2012.
3. Zhang D, Snyder AZ, Fox MD, Sansbury MW, Shimony JS, Raichle ME. Intrinsic functional relations between human cerebral cortex and thalamus. *J.Neurophysiol.* 100[4], 1740-1748. 2008.
4. Shattuck DW, Mirza M, Adisetiyo V, Hojatkashani C, Salamon G, Narr KL, Poldrack RA, Bilder RM, Toga AW. Construction of a 3D probabilistic atlas of human cortical structures. *Neuroimage.* 39[3], 1064-1080. 2-1-2008.
